# Supplementary material for: Characterization and mechanism investigation of salt-activated methionine sulfoxide reductase A from halophiles
Source: PubMed Central journal article supplement — iScience. 2024 Aug 23;27(9):110806. doi: 10.1016/j.isci.2024.110806 (PMC11408995; doi:10.1016/j.isci.2024.110806), 2024-08-23
Supplement: mmc1.pdf [file mmc1.pdf]

iScience, Volume 27

## **Supplemental information**

### **Characterization and mechanism investigation of salt-activated methionine sulfoxide reductase A from halophiles**

**Shihuan Zhou, Bochen Pan, Xiaoxue Kuang, Shuhong Chen, Lianghui Liu, Yawen Song, Yuyan Zhao, Xianlin Xu, Xiaoling Cheng, and Jiawei Yang**

## Supplemental Figures and Tables

1. **Figure S1** SDS-PAGE gel analysis of the recombinant expression of *HhMsrA* and its variants. Related to Figure 1 and 6.
2. **Figure S2** Specific activities of *pmMsrA* under various concentrations of KCl. Related to Figure 1.
3. **Figure S3** Investigation of the irreversible inhibition effects of sulfates on *HhMsrA* activity. Related to Figure 2.
4. **Figure S4** Substrates structure for specificity analysis of *HhMsrA*. Related to Figure 3.
5. **Figure S5** pH stability profile of *HhMsrA* with or without KCl. Related to Figure 4.
6. **Figure S6** Half-life profiles of variant *HhMsrA*-R168K in the presence and absence of KCl. Related to Figure 6.

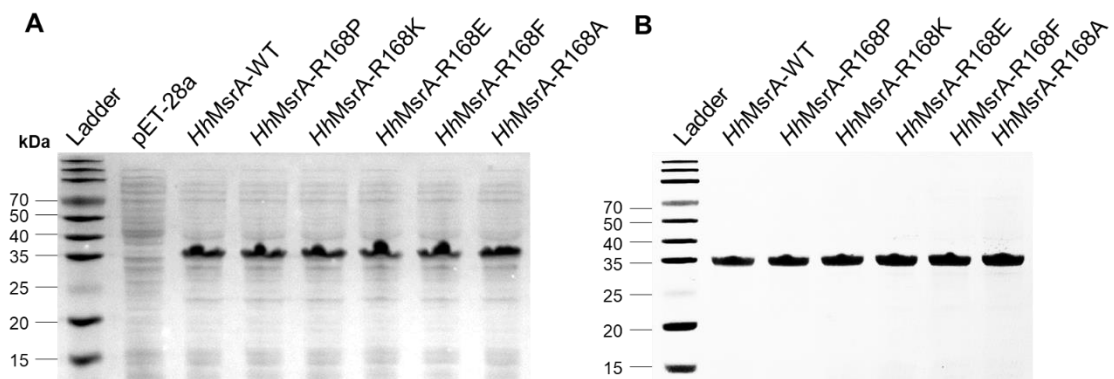

**Figure S1** SDS-PAGE gel analysis of the recombinant expression of *HhMsrA* and its variants. Thirty µg of soluble total proteins (A) and five µg of pure enzymes (B) were subjected to SDS-PAGE gel electrophoresis.

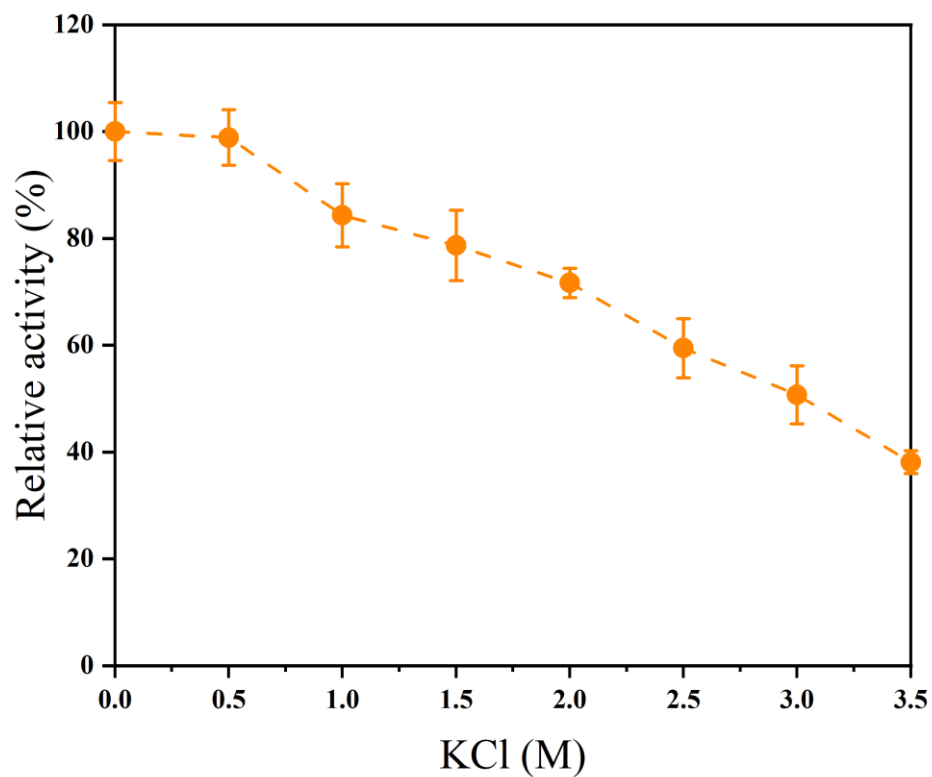

**Figure S2** Specific activities of *pmMsrA* under various concentrations of KCl. The activities were assayed through the DTT-DTNB coupled colorimetric method. Each reaction was performed in the presence of 3  $\mu$ M of pure enzyme, 3 mM of Met-O, and 1 mM of DTT for 45 min. Each value represents the mean  $\pm$  SD of three independent experiments.

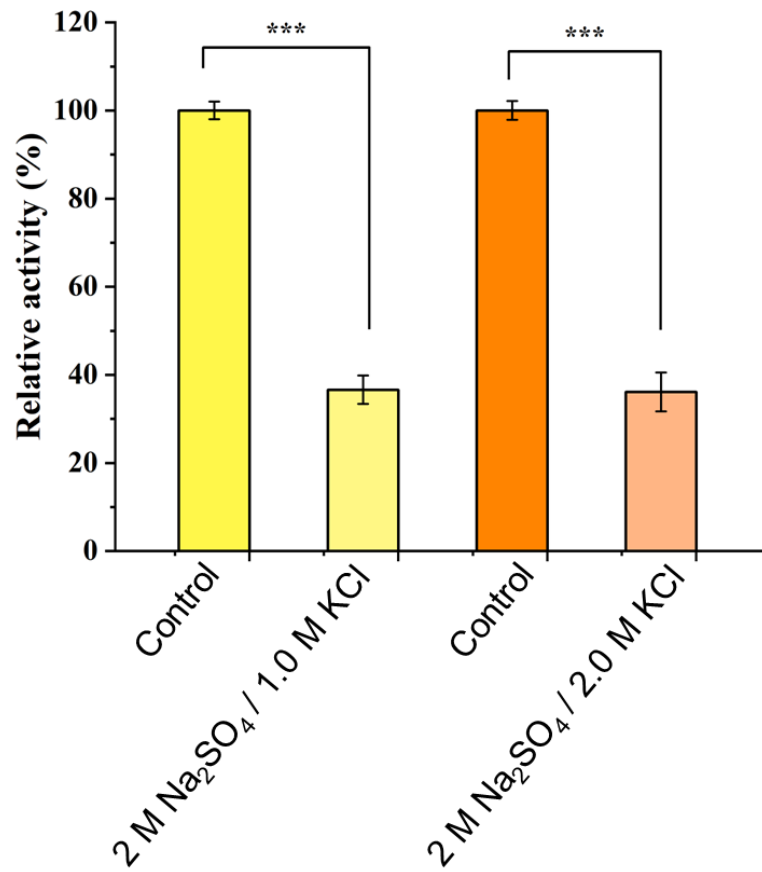

**Figure S3** Investigation of the irreversible inhibition effects of sulfates on *HhMsrA* activity.

The *HhMsrA* was first treated in a solution containing 2 M of Na<sub>2</sub>SO<sub>4</sub> for 45 min. The enzyme was then washed, and its activity was measured under 1 M and 2 M KCl conditions (pH 10.0, 40 °C). Each value represents the mean  $\pm$  SD of three independent experiments.

\*\*\* represents  $p < 0.001$ .

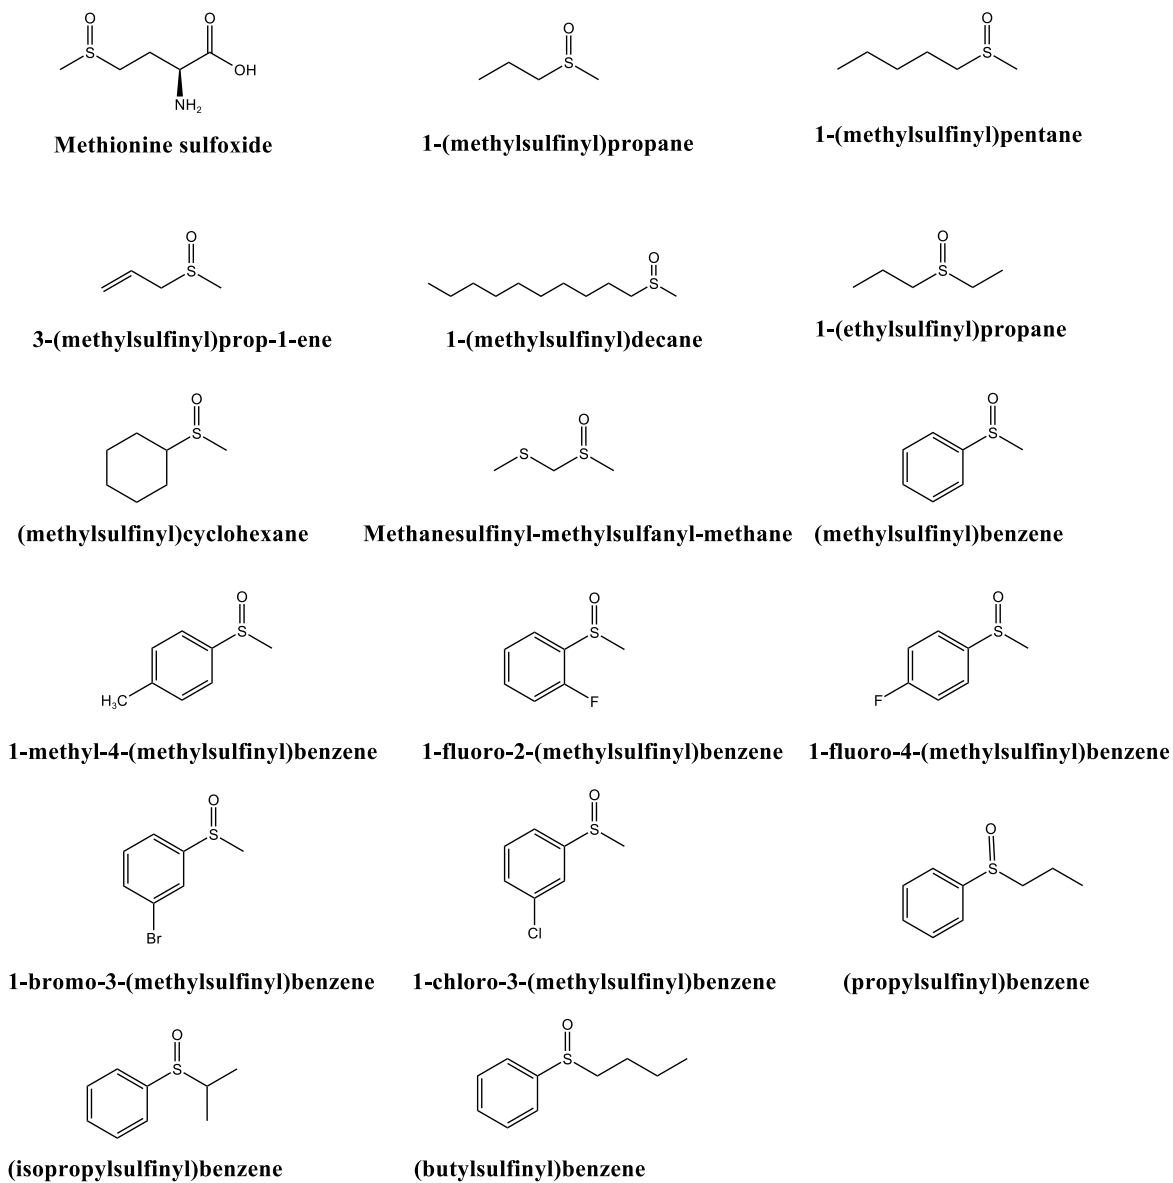

**Figure S4** Substrates structure for specificity analysis of *HhMsrA*

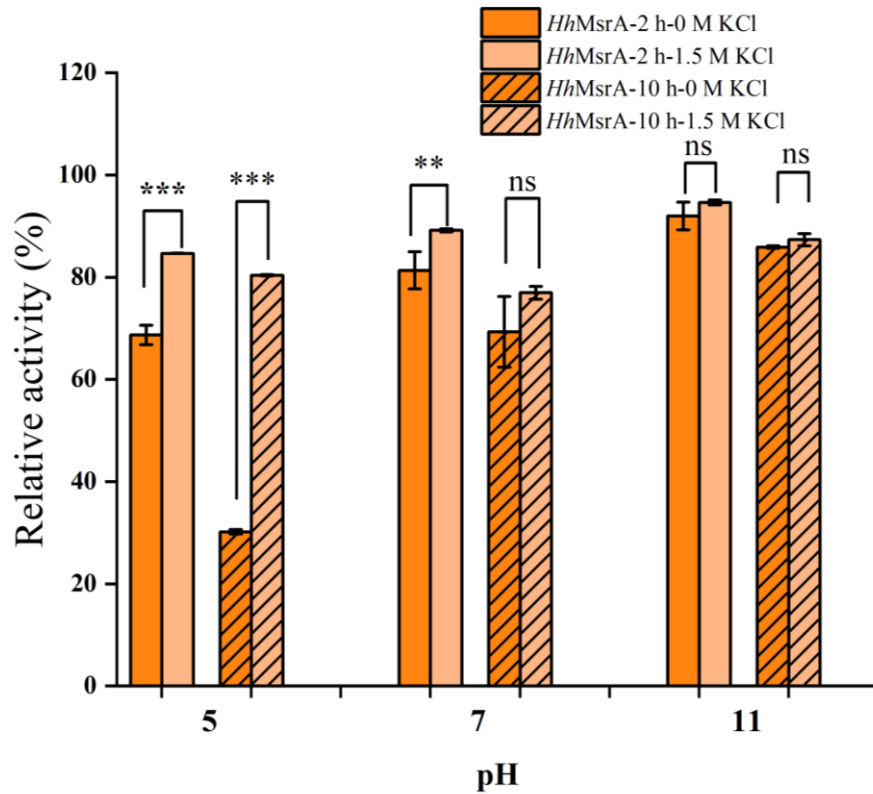

**Figure S5** pH stability profile of *HhMsrA* with and without KCl. The *HhMsrA* was first treated in solutions with pH 5, 7, and 11 for 2 h or 10 h, in the absence and presence of 1.5 M KCl. The enzyme activity was then measured under conditions of 40 °C, pH 10.0, and 1.5 M KCl. Each value represents the mean  $\pm$  SD of three independent experiments. \*\* represents  $p < 0.01$ , \*\*\* represents  $p < 0.001$ .

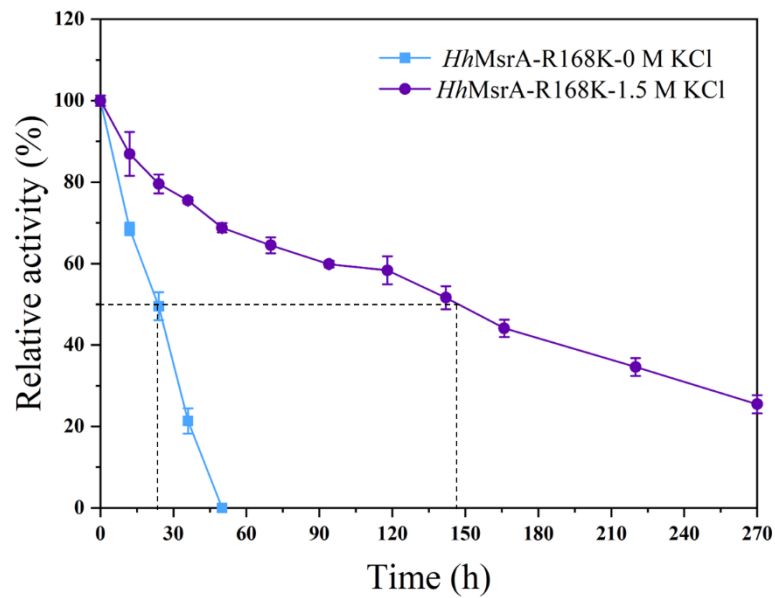

**Figure S6** Half-life profiles of variant *HhMsrA-R168K* in the presence and absence of KCl.

The enzyme was first treated at 30 °C from 0 h to 270 h, in the absence and presence of 1.5 M KCl. The enzyme activity was then measured under conditions of 40 °C, pH 10.0, and 1.5 M KCl. Each value represents the mean  $\pm$  SD of three independent experiments.
